# Supplementary material for: Estimation of Urban Evapotranspiration at High Spatiotemporal Resolution and Considering Flux Footprints
Source: MDPI journal article supplement (doi:10.3390/rs15051327), 2023-02-27
Supplement: s1 [file s1]

**Table S1.** Recommended parameter values of the PT-JPL model.

| <b>m1</b> | <b>b1</b> | <b>m2</b> | <b>b2</b> | <b><math>T_{opt}</math></b> | <b><math>\beta</math></b> | <b><math>K_{Rn}</math></b> | <b><math>K_{PAR}</math></b> |
|-----------|-----------|-----------|-----------|-----------------------------|---------------------------|----------------------------|-----------------------------|
| 1.3632    | -0.048    | 1         | -0.05     | 25                          | 1                         | 0.6                        | 0.5                         |

**Table S2.** The surface albedo  $\alpha$  and longwave emissivity  $\epsilon$  for the different land cover types.

| Parameter  | Land Cover Classification |            |       |       |         |       |                    |           |
|------------|---------------------------|------------|-------|-------|---------|-------|--------------------|-----------|
|            | crop                      | mix forest | grass | shrub | wetland | water | impervious surface | bare land |
| $\alpha$   | 0.15                      | 0.15       | 0.25  | 0.25  | 0.25    | 0.5   | 0.35               | 0.35      |
| $\epsilon$ | 0.96                      | 0.99       | 0.95  | 0.95  | 0.96    | 0.99  | 0.94               | 0.94      |
